## **Effects of LGBTQ+ Affirming Care on Uptake of Preventative Care, Management of Chronic Disease, and Aging Outcomes**

Tara McKay<sup>1,2,3</sup>, Nathaniel M. Tran<sup>2,3</sup>, Harry Barbee<sup>1,3</sup>, Judy K. Min<sup>1</sup>

1. Department of Medicine, Health, and Society, Vanderbilt University
2. Department of Health Policy, Vanderbilt University
3. LGBT Policy Lab, Vanderbilt University

### **ABSTRACT**

**Introduction:** Experiences of discrimination and bias in healthcare contribute to health disparities for LGBTQ+ and other minority populations. This study examines whether access to an LGBTQ+ affirming provider may improve health outcomes for LGBTQ+ populations by ensuring patients receive necessary and timely screenings.

**Methods:** This cross-sectional study uses Poisson regression models to examine original survey data (n=1,256) from Wave 1 of the Vanderbilt University Social Networks, Aging, and Policy Study, a panel study examining health and aging among older LGBTQ+ adults, collected between April 2020 to September 2021.

**Results:** Overall, access to an LGBTQ+ affirming is associated with uptake of several preventative health screenings, improved management of mental health conditions, and lower levels of cognitive impairment among older LGBTQ+ adults. Compared to participants reporting a usual source of care that is not affirming, participants with an LGBTQ+ affirming provider are more likely to have ever and recently received several types of preventative care, including routine checkups, colorectal cancer screenings, flu shot, and HIV test. Access to an LGBTQ+ affirming provider is also associated with better management of mental health conditions and a lower level of cognitive impairment.

**Conclusions:** Inclusive care is essential for reducing health disparities among LGBTQ+ populations. Health systems can reduce disparities by expanding education opportunities for providers regarding LGBTQ+ medicine and adopting best practices for LGBTQ+ inclusive care, including the adoption of nondiscrimination policies for LGBTQ+ patients and employees.

### **KEYWORDS**

Affirming care; LGBTQ; aging; cognitive impairment; preventative care

## **ACKNOWLEDGEMENTS**

We are grateful to members of the Vanderbilt LGBT Policy Lab for their valuable feedback on this work and to VUSNAPS participants. This work was supported by the National Institute on Aging (5R01AG063771-03, 3R01AG063771-03S1), Vanderbilt University, and Vanderbilt University Medical Center.

### **Corresponding Author:**

Tara McKay  
2301 Vanderbilt Pl  
PMB 351665  
Nashville TN 37235-1665

## INTRODUCTION

Lesbian, gay, bisexual, transgender, and queer (LGBTQ+) adults experience significant health disparities, including higher rates of hypertension, cardiovascular disease, diabetes, and suicidality relative to the general population.<sup>1-4</sup> Health disparities by sexual orientation and gender identity are especially pronounced at older ages,<sup>5-8</sup> and likely include a higher risk of all-cause cognitive decline.<sup>9</sup>

Differences in health behaviors, healthcare access, and lifetime exposure to minority stressors like homophobia and transphobia contribute to LGBTQ+ disparities in health and aging.<sup>4,10-14</sup> Although LGBTQ+ people experience minority stressors in many domains of their lives, discrimination, stigma, and harassment within healthcare settings reinforce LGBTQ+ health disparities.<sup>15,16</sup> In this paper we examine whether access to LGBTQ+ affirming healthcare affects uptake of preventive health screenings, chronic diseases management, and aging outcomes among a sample of older LGBTQ+ adults.

The negative effects of non-affirming healthcare environments on LGBTQ+ health are well documented. LGBTQ+ adults are more likely to report missed or delayed preventive screenings than their cisgender heterosexual counterparts.<sup>17-19</sup> Among older LGBTQ+ adults, delayed and foregone care are associated with prior experiences and expectations of discrimination in healthcare.<sup>5,20</sup> Among transgender adults, about one-third report delaying or avoiding necessary care due to fear or previous experiences of discrimination.<sup>21</sup> Within the LGBTQ+ population,

transgender people are less likely to be up-to-date on preventive care than lesbian, gay, and bisexual adults, and disparities are greater for transgender men than transgender women.<sup>11</sup>

LGBTQ+ adults' negative experiences in healthcare stem in part from a lack of provider fluency in LGBTQ+ health, identities, and behaviors. Surveys of physicians find that a majority have few or no reservations about providing care to LGBTQ+ populations.<sup>22,23</sup> However, given limited engagement with LGBTQ+ health in medical curricula,<sup>24–26</sup> physicians often feel unprepared to support LGBTQ+ patients.<sup>27,28</sup> Regardless of intention, providers' lack of competency may prompt LGBTQ+ patients to not disclose their sexual and gender identities, seek care outside of a primary care context, and delay or forgo care, even when care that is not related to their LGBTQ+ identity or sexual health.<sup>27,29,30</sup> Lack of physician competency in LGBTQ+ identities is also associated with a lower likelihood of partner involvement in care decisions and higher unmet medical needs for the patient.<sup>31</sup>

When patients do not feel comfortable disclosing their sexual orientation, gender identity, or discussing sexual behavior, this can lead to the provision of inappropriate care, inattention to specific health care needs, and missed diagnostic screenings.<sup>15,32–34</sup> The provision of inappropriate care is especially pronounced for sexual minority women and transgender patients. Sexual minority women are significantly less likely to be offered a Pap test than heterosexual women.<sup>18</sup> Similarly, transgender people with prostates are less likely to get screened compared to cisgender gay men and heterosexual men.<sup>35</sup> Gay and bisexual men who do not disclose their sexual orientation to their primary provider are less likely to receive HIV and other STI tests and hepatitis vaccinations.<sup>36–39</sup> The lack of affirming care options for sexual minorities can also lead

to healthcare fragmentation, where individuals seek care outside of primary care contexts because of gaps in provider knowledge, greater comfort with community providers, or expectations of discrimination.<sup>40</sup>

In contrast, access to LGBTQ+ affirming healthcare may ameliorate unmet health needs by ensuring patients receive necessary and timely screenings. For example, HIV-negative gay and bisexual men with LGBTQ+ affirming providers are more likely to have ever tested for HIV and to be aware of current HIV prevention strategies.<sup>41</sup> Institutional approaches to support LGBTQ+ patients and providers have also been associated with a range of other positive outcomes. For example, patients report higher satisfaction when health systems are LGBTQ+ affirming regardless of sexual orientation or gender identity.<sup>42</sup> Moreover, explicit and inclusive visitation policies may improve partner engagement and support for LGBTQ+ patients.<sup>43</sup> LGBTQ+ affirming healthcare providers are also more likely to have explicit employee and patient nondiscrimination policies as well as staff training in LGBTQ+ patient-centered care.<sup>44</sup>

This study focuses on the experiences of older LGBTQ+ adults in the U.S. South. Barriers to accessing and providing LGBTQ+ affirming care may be particularly acute in Southern U.S. states. An estimated 35% of LGBTQ+ adults in the U.S. live in the South, where they are more likely than anywhere else in the country to earn less than \$24,000 a year, lack health insurance, and report that they cannot afford food or healthcare.<sup>45</sup> Southern states are more likely than Northeastern and Western states to have laws that explicitly exclude or do not provide adequate care for sexual and gender minorities in healthcare.<sup>46</sup> Southern states also have fewer “LGBTQ

Healthcare Equality Leaders” compared to Northeast and Western states, according to the Human Rights Campaign 2020 Healthcare Equality Index.<sup>44</sup>

Below, we examine the healthcare determinants of receiving timely preventative screenings including regular checkups, cancer screenings, and HIV testing; chronic care management; and cognitive impairment among older LGBTQ+ adults. Specifically, we examine whether having an LGBTQ+ affirming care provider affects health, aging, and disease management outcomes among older LGBTQ+ adults compared with LGBTQ+ adults who have a regular source of care that they do not perceive as affirming. Importantly, whereas few studies have adequate sample sizes to investigate drivers of within-group variation in health and aging among the LGBTQ+ population, we are able to identify healthcare experiences within the LGBTQ+ population that may contribute to resilience in later life, or conversely, exacerbate negative effects of minority stress exposures.<sup>6</sup> Additionally, by focusing on older adults aged 50 to 76, a group that is understudied despite high rates of unmet medical needs, we are able to assess both recent and lifetime uptake of many preventative cancer screenings that only are recommended later in life and investigate links to other aging outcomes.

## **METHODS**

### **Study Sample**

This cross-sectional study uses survey data (n=1,256) from Wave 1 of the Vanderbilt University Social Networks, Aging, and Policy Study (VUSNAPS), a panel study examining older LGBTQ+ adults’ health and aging, collected between April 2020 to September 2021. Participants include LGBTQ+ adults aged 50 to 76 who reside in Alabama, Georgia, North

Carolina, and Tennessee. This study was approved by the Vanderbilt University Institutional Review Board. VUSNAPS recruited participants using community outreach at LGBTQ+ and senior organizations, events, and paid targeted online ads on social media platforms. In the following analysis, we limit the sample to those who report having a usual source of care other than an emergency room (n=1,128) to make appropriate comparisons.

## **Measures**

Access to an LGBTQ+ affirming health care provider. Participants were asked “Do you have an LGBT-affirming health care provider?” with response options: “Yes, they are my primary health care provider; Yes, I see them in addition to another health care provider; No, I don’t need or want an LGBT-affirming health care provider; No, I cannot find an LGBT-affirming health care provider in my area; I don’t know; and No answer.” Respondents who reported “Yes” were coded as having access to an LGBTQ+ affirming health care provider. All others were coded as no.

Health. We examine several health and aging outcomes, including self-rated health, chronic disease management, receipt of appropriate, timely, and lifetime preventative care, cognitive impairment, and impairments to activities of living (ADL).

We measure chronic disease management for five conditions: high blood pressure, diabetes, any heart condition, any respiratory condition, any mental health condition. Conditional on having a specific health condition, participants were asked: “Is your condition [high blood pressure,

diabetes, heart condition, respiratory condition, mental health condition] pretty much under control (1) or is it still a problem (0)?”).

We measure receipt of appropriate, timely, and lifetime preventive care using two measures. First, participants were asked, “Have you ever had any of the following preventative care screenings or tests?” including flu shot, breast cancer screening or mammogram (women and transgender only), pap smear or pap test (women and transgender only), colorectal cancer screening or colonoscopy, and HIV test. If participants indicated ever having one or more of these tests, they were then asked, “Have you had any of the following tests or screenings in the last 3 years?”). Although screening recommendations vary, the U.S. Centers for Disease Control and Prevention and the U.S. Preventative Task Force recommend mammogram screening, cervical cancer screening, and HIV testing at least every three years for most adults in our sample.<sup>47</sup> Colorectal cancer screening is recommended for all adults beginning at age 50, and then every 5 to 10 years depending on screening mode and other risk factors. For this reason, we only use lifetime receipt of colorectal cancer screening as an outcome.

Aging. We measure level of cognitive impairment using an adapted version of Informant Questionnaire on Cognitive Decline in the Elderly (IQCoDE), a 16-item measure capturing difficulty remembering and making day-to-day decisions. In the adapted version, participants were asked to endorse items that apply rather than rate their trajectory as in the original IQCoDE. Impairments to activities of daily living (ADL) are measured using a 5-item measure as operationalized by CDC surveillance methods.<sup>48</sup> ADLs include difficulty walking several blocks,



dressing oneself, bathing or showering oneself, difficulty hearing, difficulty seeing or reading, or none of the above.

Covariates. We control for participant age, race and ethnicity (person of color vs non-Hispanic white), gender identity (cisgender man, cisgender woman, transgender/nonbinary/gender nonconforming), education (college degree or more vs less than college degree), household income, state of residency, and health insurance coverage. We also adjust for whether the participant has any chronic conditions and whether the participant reports a memory-related disease diagnosis in some models, as specified below.

### **Statistical Analysis**

All analyses were conducted using Stata v17. For binary outcome variables, we estimated adjusted risk ratios using modified Poisson models with robust error variance which provides easily interpretable and unbiased estimates when the outcomes is common.<sup>49,50</sup> We use adjusted Poisson regression models to test for differences in count outcomes (number of items endorsed for cognitive difficulties and number of ADLs). All adjusted models control for age, race and ethnicity, gender, education, household income, state of residency, and health insurance coverage. Models predicting number of ADLs control for having any chronic conditions and models for cognitive impairment controlled for having a memory-related disease diagnosis.

## **RESULTS**

### **Access to an LGBTQ+ Affirming Care Provider**

The study sample includes 1,128 LGBTQ+ adults with a usual source of care. Of these, about two-thirds (63%) report having an LGBTQ+ affirming provider. Table 1 presents full demographic characteristics of the sample by whether they reported having an affirming provider. Individuals with an LGBTQ+ affirming provider are more likely to identify as cisgender men, transgender, or gender non-binary (66.9% vs 55.2%,  $p < 0.001$ ), as white (88.7% vs 83.8%,  $p = 0.062$ ), to have completed a college degree or higher (75.1% vs 65.11%,  $p = 0.001$ ), to have a family income above \$60,000 (66.9% vs 54.9%,  $p < .001$ ), to be living in North Carolina or Tennessee (63.2% vs 54.7%,  $p = 0.002$ ). Individuals who reported having an affirming provider are also more likely to have health insurance coverage (97.0% vs 94.2,  $p = 0.019$ ), to be HIV positive (16.5% vs 3.9%,  $p < 0.001$ ), and to have 1 or more chronic conditions (89.0% vs 85.0%,  $p = 0.051$ ).

### **Preventive Care**

Table 2 presents the adjusted risk ratios for the effect of having an LGBTQ+ affirming care provider on update of preventive care, chronic disease management, and aging outcomes. Compared to participants who report a usual source of care that is not affirming, participants with an LGBTQ+ affirming provider are more likely to have ever and recently received several types of preventative care. Individuals with an LGBTQ+ affirming provider are 4.5% (95% CI 1.7 to 7.4%,  $p < .001$ ) more likely to have had a routine checkup in the past year, 7.6% (95% CI 0.7 to 15.0%,  $p < .05$ ) more likely to have ever had a colorectal cancer screening, 6.8% (95% CI 1.9 to 11.9%,  $p < .001$ ) more likely to have ever had a flu shot, 8.6% (95% CI 2.9% to 14.6%,  $p < .001$ ) more likely to have had a flu shot in the last 3 years. Gay and bisexual men and transgender people with an affirming provider are 14.4% (95% CI 4.3% to 25.3%,  $p < .001$ ) more

likely to have ever had an HIV test, and 35.7% (95% CI 9.7 to 67.8%,  $p < .001$ ) more likely to have an HIV test in the last 3 years. We do not observe differences in the timely or lifetime receipt of pap smear and mammogram screenings among women and transgender people as a function of having an affirming care provider. Figure 1 plots adjusted risk ratios for all preventive care and chronic disease management outcomes estimated using modified Poisson regression models.

### **Chronic Disease Management**

LGBTQ+ individuals with an affirming provider are 12.2% (95% CI 0.0% to 25.9%,  $p < 0.10$ ) more likely to have their mental health condition under control. We do not observe significant differences by provider type in the likelihood that other health conditions are reported as “under control” for those with high blood pressure, diabetes, heart conditions, respiratory conditions, or arthritis/rheumatism.

### **Aging Outcomes**

LGBTQ+ individuals with an affirming provider report 18.8% (95% CI 34.4% to 0.0) fewer cognitive impairments controlling for individual characteristics and the presence of a memory-related disease diagnosis. We found no association between access to an LGBTQ+ affirming provider and impairments to ADLs.

## **DISCUSSION**

Access to an LGBTQ+ affirming provider is associated with timely and lifetime receipt of preventative care for several recommended screenings, better patient-reported management of

mental health conditions, and lower cognitive impairment among a sample of older LGBTQ+ adults in the U.S. South. We find that those who identify their primary care provider as LGBTQ+ affirming are more likely to have had a routine checkup in the last year, to have ever had a flu shot, and to have ever had a colorectal cancer screening compared to LGBTQ+ adults who have a usual source of care that is not affirming.

Notably, gay and bisexual men and transgender people with an affirming care provider are more likely to have ever had an HIV test and more likely to have had an HIV test in the last 3 years. These results help us better understand LGBTQ+ health disparities in the U.S. South, where more than half of new HIV infections in the U.S. occur and where HIV-positive people are more than 3 times more likely to die from the disease compared to the rest of the country.<sup>51</sup>

While we find no effect of having an LGBTQ+ affirming provider on lifetime or timely receipt of pap smear or mammogram screenings, this may be attributable to relatively high baseline rates of these preventive services, provider-based factors such as payment benchmarks for timely screening, and patient-based factors such as common awareness, longer lifetime risk exposure for pap smear, and acceptability of these services compared to HIV tests or colorectal cancer screening.<sup>52-56</sup>

LGBTQ+ patients go to great lengths to identify affirming providers.<sup>27</sup> This study indicates that patients who can access affirming providers enjoy health rewards. LGBTQ+ adults with a mental health condition are more likely to report that their mental health condition is under control when they also had an affirming provider. We also observe differences in levels of cognitive

impairment among LGBTQ+ adults by provider type, with higher levels of impairment among those with a nonaffirming provider, even after controlling for individual predictors of cognitive impairment including memory-related disease diagnoses. Although we only observe a cross-sectional association with just one wave of data collection complete, this result is concordant with theoretical work by Corerro and colleagues<sup>9</sup> suggesting that increased minority stress in a care environment may exacerbate the effects of stress on multiple bodily systems and lead to greater cognitive decline.

More broadly, and across outcomes, affirming care environments may improve health outcomes for LGBTQ+ patients because they promote engagement and retention in care, more timely preventative screenings, trust in and uptake of provider recommendations, and higher quality patient-provider interactions leading to the identification/disclosure of new or developing problem areas. Affirming care may thus allow for earlier diagnoses, more open conversations about patient needs and concerns, more patient uptake of provider recommendations for condition management, and greater involvement of partners and caregivers. Finally, for populations who are hesitant or lack trust in their healthcare providers,<sup>5,20</sup> retention in care, measured here as having had a recent routine checkup from a usual source of care, is a major achievement.

Health systems, including institutions of medical, nursing, physician assistant, and pharmacy education, should prioritize LGBTQ+ inclusive practices to achieve health equity for aging LGBTQ+ populations. Formal continuing education offerings should expand opportunities to learn about LGBTQ+ identities, family structures, behaviors, and health needs beyond sexual

health and HIV. Providers should have robust understandings of health disparities across social identities and adopt best practices for LGBTQ+ inclusive and affirming healthcare systems and care environments. These changes will be a first step toward improving LGBTQ+ engagement with preventive services and health systems more broadly.

Longer-term, health systems can improve training and retention opportunities for LGBTQ+ health professionals by adopting explicit nondiscrimination policies and expanding fellowship and residency opportunities in LGBTQ+ health and medicine. Physician workforce diversity matters for patient outcomes and reducing health disparities. Multiple rigorous studies now demonstrate that having a gender- or race-match between doctors and patients reduces mortality and adverse outcomes in hospital settings, increases uptake of preventative care, and increases patient satisfaction.<sup>57-61</sup> While we do not expect that all LGBTQ+ patients would ultimately need or want to access an LGBTQ+ provider, LGBTQ+ health disparities may be improved by increasing residency and fellowship opportunities in LGBTQ+ medicine and for LGBTQ+ physicians, and by decreasing experiences of discrimination on the job that threaten retention of LGBTQ+ health professionals.<sup>43</sup>

## **CONCLUSION**

Having an LGBTQ+ affirming provider versus a regular source of care that is not affirming is associated with greater uptake of preventive care, better patient-reported management of mental health conditions, and lower cognitive impairment among older LGBTQ+ adults in the U.S. South. To address LGBTQ+ health disparities and improve the aging experiences of LGBTQ+ adults, medical education and health care systems must expand formal and continuing education

opportunities around LGBTQ+ medicine and adopt best practices for LGBTQ+ inclusive care, including the adoption of nondiscrimination policies for employees.

## REFERENCES

1. IOM. *The Health of Lesbian, Gay, Bisexual, and Transgender People: Building a Foundation for a Better Understanding.*; 2011.
2. Gonzales G, Henning-Smith C. Health Disparities by Sexual Orientation: Results and Implications from the Behavioral Risk Factor Surveillance System. *J Community Health.* 2017;42(6):1163-1172. doi:10.1007/s10900-017-0366-z
3. Lyons BH, Walters ML, Jack SPD, Petrosky E, Blair JM, Ivey-Stephenson AZ. Suicides Among Lesbian and Gay Male Individuals: Findings From the National Violent Death Reporting System. *Am J Prev Med.* 2019;56(4):512-521. doi:10.1016/J.AMEPRE.2018.11.012/ATTACHMENT/D91146F8-37B3-466D-ADA3-09365815074F/MMC1.PDF
4. Downing JM, Przedworski JM. Health of Transgender Adults in the U.S., 2014–2016. *Am J Prev Med.* 2018;55(3):336-344. doi:10.1016/J.AMEPRE.2018.04.045
5. Fredriksen-Goldsen KI, Kim H-J, Barkan SE, Muraco A, Hoy-Ellis CP. Health disparities among lesbian, gay, and bisexual older adults: results from a population-based study. *Am J Public Health.* 2013;103(10):1802-1809. doi:10.2105/AJPH.2012.301110
6. Fredriksen-Goldsen KI, Kim H-J, Bryan AEB, Shiu C, Emlet CA. The Cascading Effects of Marginalization and Pathways of Resilience in Attaining Good Health Among LGBT Older Adults. *Gerontologist.* 2017;57(suppl 1):S72-S83. doi:10.1093/geront/gnw170
7. Gonzales G, Henning-Smith C. Disparities in health and disability among older adults in same-sex cohabiting relationships. *J Aging Health.* 2015;27(3):432-453. doi:10.1177/0898264314551332
8. Fredriksen-Goldsen KI, Cook-Daniels L, Kim HJ, et al. Physical and Mental Health of



- Transgender Older Adults: An At-Risk and Underserved Population. *Gerontologist*. 2014;54(3):488-500. doi:10.1093/GERONT/GNT021
9. Correro AN, Nielson KA. A review of minority stress as a risk factor for cognitive decline in lesbian, gay, bisexual, and transgender (LGBT) elders. <https://doi.org/10.1080/1935970520191644570>. 2019;24(1):2-19. doi:10.1080/19359705.2019.1644570
  10. Hoy-Ellis CP, Fredriksen-Goldsen KI. Lesbian, gay, & bisexual older adults: linking internal minority stressors, chronic health conditions, and depression. <http://dx.doi.org/10.1080/1360786320161168362>. 2016;20(11):1119-1130. doi:10.1080/13607863.2016.1168362
  11. Hoy-Ellis CP, Fredriksen-Goldsen KI, Kim HJ. Utilization of Recommended Preventive Health Screenings Between Transgender and Cisgender Older Adults in Sexual and Gender Minority Communities: <https://doi.org/10.1177/08982643211068557>. 2022;2022(0):1-14. doi:10.1177/08982643211068557
  12. Tran NM, Henkhaus LE, Gonzales G. Adverse Childhood Experiences and Mental Distress Among US Adults by Sexual Orientation. *JAMA Psychiatry*. Published online February 23, 2022. doi:10.1001/JAMAPSYCHIATRY.2022.0001
  13. Gonzales G, McKay T, Carpenter CS. Disparities in Health Insurance Coverage and Access to Care for Children By Mother's Sexual Orientation. *Matern Child Health J*. 2019;24(5):630-639. doi:10.1007/s10995-019-02857-7
  14. Gonzales G, Przedworski J, Henning-Smith C. Comparison of Health and Health Risk Factors Between Lesbian, Gay, and Bisexual Adults and Heterosexual Adults in the United States: Results From the National Health Interview Survey. *JAMA Intern Med*.

- 2016;176(9):1344-1351. doi:10.1001/JAMAINTERNMED.2016.3432
15. Romanelli M, Lindsey MA. Patterns of Healthcare Discrimination Among Transgender Help-Seekers. *Am J Prev Med*. 2020;58(4):e123-e131.  
doi:10.1016/J.AMEPRE.2019.11.002
  16. Reisner SL, Pardo ST, Gamarel KE, Hughto JMW, Pardee DJ, Keo-Meier CL. Substance use to cope with stigma in healthcare among U.S. female-to-male trans masculine adults. *LGBT Heal*. 2015;2(4):324-332. doi:10.1089/lgbt.2015.0001
  17. Agénor M, Krieger N, Austin SB, Haneuse S, Gottlieb BR. Sexual orientation disparities in papanicolaou test use among US women: The role of sexual and reproductive health services. *Am J Public Health*. 2014;104(2). doi:10.2105/AJPH.2013.301548
  18. Agénor M, Krieger N, Austin SB, Haneuse S, Gottlieb BR. At the intersection of sexual orientation, race/ethnicity, and cervical cancer screening: assessing Pap test use disparities by sex of sexual partners among black, Latina, and white U.S. women. *Soc Sci Med*. 2014;116:110-118. doi:10.1016/J.SOCSCIMED.2014.06.039
  19. Tabaac AR, Sutter ME, Wall CSJ, Baker KE. Gender Identity Disparities in Cancer Screening Behaviors. *Am J Prev Med*. 2018;54(3):385-393.  
doi:10.1016/j.amepre.2017.11.009
  20. MetLife. *Still out, Still Aging: The MetLife Study of Lesbian, Gay, Bisexual, and Transgender Baby Boomers.*; 2010.
  21. Ceres M, Quinn GP, Loscalzo M, Rice D. Cancer Screening Considerations and Cancer Screening Uptake for Lesbian, Gay, Bisexual, and Transgender Persons. *Semin Oncol Nurs*. 2018;34(1):37-51. doi:10.1016/J.SONCN.2017.12.001
  22. Aleshire ME, Ashford K, Fallin-Bennett A, Hatcher J. Primary Care Providers' Attitudes

- Related to LGBTQ People: A Narrative Literature Review. *Health Promot Pract.* 2019;20(2):173-187. doi:10.1177/1524839918778835
23. Marlin R, Kadakia A, Ethridge B, Mathews WC. Physician Attitudes Toward Homosexuality and HIV: The PATHH-III Survey. *LGBT Heal.* 2018;5(7):431. doi:10.1089/LGBT.2018.0041
24. Sutter ME, Simmons VN, Sutton SK, et al. Oncologists' experiences caring for LGBTQ patients with cancer: Qualitative analysis of items on a national survey. *Patient Educ Couns.* 2021;104(4):871-876. doi:10.1016/J.PEC.2020.09.022
25. Obedin-Maliver J, Goldsmith ES, Stewart L, et al. Lesbian, Gay, Bisexual, and Transgender-Related Content in Undergraduate Medical Education. *JAMA.* 2011;306(9):971-977. doi:10.1001/JAMA.2011.1255
26. Keuroghlian AS, Ard KL, Makadon HJ. Advancing health equity for lesbian, gay, bisexual and transgender (LGBT) people through sexual health education and LGBT-affirming health care environments. *Sex Health.* 2017;14(1):119-122. doi:10.1071/SH16145
27. Khalili J, Leung LB, Diamant AL. Finding the Perfect Doctor: Identifying Lesbian, Gay, Bisexual, and Transgender-Competent Physicians. *Am J Public Health.* 2015;105(6):1114. doi:10.2105/AJPH.2014.302448
28. Parameshwaran V, Cockbain BC, Hillyard M, Price JR. Is the Lack of Specific Lesbian, Gay, Bisexual, Transgender and Queer/Questioning (LGBTQ) Health Care Education in Medical School a Cause for Concern? Evidence From a Survey of Knowledge and Practice Among UK Medical Students. *J Homosex.* 2017;64(3):367-381. doi:10.1080/00918369.2016.1190218

29. Rossman K, Salamanca P, Macapagal K. A Qualitative Study Examining Young Adults' Experiences of Disclosure and Nondisclosure of LGBTQ Identity to Health Care Providers. *https://doi-org.proxy.library.vanderbilt.edu/101080/0091836920171321379*. 2017;64(10):1390-1410. doi:10.1080/00918369.2017.1321379
30. Mimiaga MJ, Goldhammer H, Belanoff C, Tetu AM, Mayer KH. Men who have sex with men: Perceptions about sexual risk, HIV and sexually transmitted disease testing, and provider communication. *Sex Transm Dis*. 2007;34(2):113-119. doi:10.1097/01.OLQ.0000225327.13214.BF
31. Seay J, Mitteldorf D, Yankie A, Pirl WF, Kobetz E, Schlumbrecht M. Survivorship care needs among LGBT cancer survivors. *J Psychosoc Oncol*. 2018;36(4):393-405. doi:10.1080/07347332.2018.1447528
32. Makadon HJ. Improving Health Care for the Lesbian and Gay Communities. *http://dx.doi.org/101056/NEJMp058259*. 2009;354(9):895-897. doi:10.1056/NEJMP058259
33. Mayer KH, Bradford JB, Makadon HJ, Stall R, Goldhammer H, Landers S. Sexual and gender minority health: what we know and what needs to be done. *Am J Public Health*. 2008;98(6):989-995. doi:10.2105/AJPH.2007.127811
34. Kamen CS, Smith-Stoner M, Heckler CE, Flannery M, Margolies L, Article L. Social support, self-rated health, and lesbian, gay, bisexual, and transgender identity disclosure to cancer care providers. *Oncol Nurs Forum ONF*. 2015;42(1):44-51. doi:10.1188/15.ONF.44-51
35. Ma SJ, Oladeru OT, Wang K, et al. Prostate Cancer Screening Patterns Among Sexual and Gender Minority Individuals. *Eur Urol*. 2021;79(5):588-592.

- doi:10.1016/J.EURURO.2020.11.009
36. Petroll AE, Mosack KE. Physician awareness of sexual orientation and preventive health recommendations to men who have sex with men. *Sex Transm Dis*. 2011;38(1):63-67.  
doi:10.1097/OLQ.0B013E3181EBD50F
  37. Ng BE, Moore D, Michelow W, et al. Relationship between disclosure of same-sex sexual activity to providers, HIV diagnosis and sexual health services for men who have sex with men in Vancouver, Canada. *Can J Public Heal* 2014 1053. 2014;105(3):e186-e191.  
doi:10.17269/CJPH.105.4212
  38. Stupiansky NW, Liao A, Rosenberger J, et al. Young Men's Disclosure of Same Sex Behaviors to Healthcare Providers and the Impact on Health: Results from a US National Sample of Young Men Who Have Sex with Men. *AIDS Patient Care*. 2017;31(8):342-347. doi:10.1089/apc.2017.0011
  39. Metheny N, Stephenson R. Disclosure of Sexual Orientation and Uptake of HIV Testing and Hepatitis Vaccination for Rural Men Who Have Sex With Men. *Ann Fam Med*. 2016;14(2):155-158. doi:10.1370/AFM.1907
  40. Griffin M, Krause KD, Kapadia F, Halkitis PN. A Qualitative Investigation of Healthcare Engagement Among Young Adult Gay Men in New York City: A P18 Cohort Substudy. <https://home.liebertpub.com/lgbt>. 2018;5(6):368-374. doi:10.1089/LGBT.2017.0015
  41. McKay T, Akre E-R, Henne J, Conway A, Gothelf I, Kari N. LGBTQ+ Affirming Care May Increase Awareness and Understanding of Undetectable=Untransmittable among Midlife and Older Gay and Bisexual Men in the US South. *SSRN Work Pap*. Published online 2021:1-21.
  42. DiLeo R, Borkowski N, O'Connor SJ, Datti P, Weech-Maldonado R. The Relationship

- Between “Leader in LGBT Healthcare Equality” Designation and Hospitals’ Patient Experience Scores. *J Healthc Manag.* 2020;65(5):366-377. doi:10.1097/JHM-D-19-00177
43. Eliason MJ, Dibble SL, Robertson PA. Lesbian, gay, bisexual, and transgender (LGBT) physicians’ experiences in the workplace. *J Homosex.* 2011;58(10):1355-1371. doi:10.1080/00918369.2011.614902
44. Human Rights Campaign. *Healthcare Equality Index 2020.*; 2020. [https://reports.hrc.org/healthcare-equality-index-2020?\\_ga=2.110411589.1716543049.1639417084-1286041670.1639417084](https://reports.hrc.org/healthcare-equality-index-2020?_ga=2.110411589.1716543049.1639417084-1286041670.1639417084)
45. Mallory C, Flores A, Sears B. *LGBT in the South.*; 2016.
46. Movement Advancement Project. Equality Maps: Healthcare Laws and Policies. Published 2021. [https://www.lgbtmap.org/equality-maps/healthcare\\_laws\\_and\\_policies](https://www.lgbtmap.org/equality-maps/healthcare_laws_and_policies)
47. US Centers for Disease Control and Prevention. A and B Recommendations | United States Preventive Services Taskforce. Accessed March 24, 2022. <https://www.uspreventiveservicestaskforce.org/uspstf/recommendation-topics/uspstf-and-b-recommendations>
48. Okoro CA, Hollis ND, Cyrus AC, Griffin-Blake S. Prevalence of Disabilities and Health Care Access by Disability Status and Type Among Adults — United States, 2016. *MMWR Morb Mortal Wkly Rep.* 2019;67(32):882-887. doi:10.15585/MMWR.MM6732A3
49. McNutt LA, Wu C, Xue X, Hafner JP. Estimating the Relative Risk in Cohort Studies and Clinical Trials of Common Outcomes. *Am J Epidemiol.* 2003;157(10):940-943. doi:10.1093/AJE/KWG074
50. Zou G. A Modified Poisson Regression Approach to Prospective Studies with Binary Data. *Am J Epidemiol.* 2004;159(7):702-706. doi:10.1093/AJE/KWH090

51. Centers for Disease Control and Prevention. HIV in the Southern United States. 2019;29(September):1-4.  
<http://www.cdc.gov/><https://www.cdc.gov/hiv/pdf/policies/cdc-hiv-in-the-south-issue-brief.pdf>
52. Vermund SH, Wilson CM. Barriers to HIV testing--where next? *Lancet (London, England)*. 2002;360(9341):1186-1187. doi:10.1016/S0140-6736(02)11291-8
53. Rayment M, Thornton A, Mandalia S, et al. HIV Testing in Non-Traditional Settings – The HINTS Study: A Multi-Centre Observational Study of Feasibility and Acceptability. *PLoS One*. 2012;7(6):e39530. doi:10.1371/JOURNAL.PONE.0039530
54. Wee CC, McCarthy EP, Phillips RS. Factors associated with colon cancer screening: the role of patient factors and physician counseling. *Prev Med (Baltim)*. 2005;41(1):23-29. doi:10.1016/J.YPMED.2004.11.004
55. Mestre-Bach G, Blycker GR, Potenza MN. Pornography use in the setting of the COVID-19 pandemic. *J Behav Addict*. 2020;9(2):181-183. doi:10.1556/2006.2020.00015
56. Kirkoen B, Berstad P, Botteri E, et al. Acceptability of two colorectal cancer screening tests: pain as a key determinant in sigmoidoscopy. *Endoscopy*. 2017;49(11):1075-1086. doi:10.1055/S-0043-117400
57. Greenwood BN, Carnahan S, Huang L. Patient–physician gender concordance and increased mortality among female heart attack patients. *Proc Natl Acad Sci U S A*. 2018;115(34):8569-8574. doi:10.1073/PNAS.1800097115/SUPPL\_FILE/PNAS.1800097115.SAPP.PDF
58. Greenwood GL, Gruskin EP. LGBT Tobacco and Alcohol Disparities. In: Meyer IH, Northridge ME, eds. *The Health of Sexual Minorities*. Springer US; 2007:566-583.

doi:10.1007/978-0-387-31334-4\_23

59. Wallis CJD, Jerath A, Coburn N, et al. Association of Surgeon-Patient Sex Concordance With Postoperative Outcomes. *JAMA Surg.* 2022;157(2):146-156.

doi:10.1001/JAMASURG.2021.6339

60. Alsan M, Garrick O, Graziani G. Does Diversity Matter for Health? Experimental Evidence from Oakland. *Am Econ Rev.* 2019;109(12):4071-4111.

doi:10.1257/AER.20181446

61. Laveist TA, Nuru-Jeter A. Is doctor-patient race concordance associated with greater satisfaction with care? *J Health Soc Behav.* 2002;43(3):296-306. doi:10.2307/3090205



| <b>Table 1. Demographic Characteristics of the Sample</b> |                                     |      |            |      |         |
|-----------------------------------------------------------|-------------------------------------|------|------------|------|---------|
|                                                           | Access to LGBTQ+ Affirming Provider |      |            |      |         |
|                                                           | No Access                           |      | Yes Access |      |         |
|                                                           | No.                                 | %    | No.        | %    | p-value |
| <b>Gender</b>                                             |                                     |      |            |      | <.001   |
| Cis Man                                                   | 211                                 | 51.1 | 406        | 57.3 |         |
| Cis Woman                                                 | 185                                 | 44.8 | 234        | 33.1 |         |
| Trans/NB/GNC                                              | 17                                  | 4.1  | 68         | 9.6  |         |
| Total                                                     | 413                                 | 100  | 708        | 100  |         |
| <b>Race and Ethnicity</b>                                 |                                     |      |            |      | 0.062   |
| White                                                     | 346                                 | 83.8 | 628        | 88.7 |         |
| Black                                                     | 38                                  | 9.2  | 45         | 6.4  |         |
| Other POC                                                 | 29                                  | 7    | 35         | 4.9  |         |
| Total                                                     | 413                                 | 100  | 708        | 100  |         |
| <b>Education</b>                                          |                                     |      |            |      | <.001   |
| High school or less                                       | 26                                  | 6.3  | 26         | 3.7  |         |
| Some college, AA, Trade                                   | 110                                 | 26.6 | 140        | 19.8 |         |
| College degree                                            | 136                                 | 32.9 | 216        | 30.5 |         |
| Graduate/Professional d                                   | 133                                 | 32.2 | 316        | 44.6 |         |
| Other educ                                                | 8                                   | 1.9  | 10         | 1.4  |         |
| Total                                                     | 413                                 | 100  | 708        | 100  |         |
| <b>Family Income</b>                                      |                                     |      |            |      | <.001   |
| <35k                                                      | 100                                 | 24.2 | 119        | 16.8 |         |
| 35-45k                                                    | 29                                  | 7    | 45         | 6.4  |         |
| 45-60k                                                    | 57                                  | 13.8 | 71         | 10   |         |
| 60-75k                                                    | 48                                  | 11.6 | 87         | 12.3 |         |
| 75-100k                                                   | 66                                  | 16   | 92         | 13   |         |
| 100-125k                                                  | 48                                  | 11.6 | 96         | 13.6 |         |
| 125k+                                                     | 65                                  | 15.7 | 198        | 28   |         |
| Total                                                     | 413                                 | 100  | 708        | 100  |         |
| <b>State of Residency</b>                                 |                                     |      |            |      | 0.002   |
| Alabama                                                   | 94                                  | 22.8 | 108        | 15.3 |         |
| North Carolina                                            | 97                                  | 23.5 | 225        | 31.8 |         |
| Tennessee                                                 | 129                                 | 31.2 | 222        | 31.4 |         |
| Georgia                                                   | 93                                  | 22.5 | 153        | 21.6 |         |
| Total                                                     | 413                                 | 100  | 708        | 100  |         |
| <b>Health Insurance</b>                                   |                                     |      |            |      | 0.019   |
| No                                                        | 24                                  | 5.8  | 21         | 3    |         |
| Yes                                                       | 389                                 | 94.2 | 687        | 97   |         |
| Total                                                     | 413                                 | 100  | 708        | 100  |         |
| <b>HIV Status</b>                                         |                                     |      |            |      | <.001   |

|                                              |     |      |     |      |       |
|----------------------------------------------|-----|------|-----|------|-------|
| Negative/Don't Know                          | 397 | 96.1 | 591 | 83.5 |       |
| Positive                                     | 16  | 3.9  | 117 | 16.5 |       |
| Total                                        | 413 | 100  | 708 | 100  |       |
| <b>Any Chronic Condition</b>                 |     |      |     |      | 0.051 |
| None                                         | 62  | 15   | 78  | 11   |       |
| 1 or more                                    | 351 | 85   | 630 | 89   |       |
| Total                                        | 413 | 100  | 708 | 100  |       |
| Data come from Wave I VUSNAPS (R01-AG063771) |     |      |     |      |       |

| Table 2. Preventive Care, Chronic Disease Management, and Aging Outcomes by access to LGBTQ+ Affirming Provider                                                                                                                                                                                  |           |      |            |      |          |               |             |
|--------------------------------------------------------------------------------------------------------------------------------------------------------------------------------------------------------------------------------------------------------------------------------------------------|-----------|------|------------|------|----------|---------------|-------------|
|                                                                                                                                                                                                                                                                                                  | No Access |      | Yes Access |      | aRR      | 95% CI        | Sample Size |
|                                                                                                                                                                                                                                                                                                  | No        | %    | No         | %    |          |               |             |
| <b>Preventive Care</b>                                                                                                                                                                                                                                                                           |           |      |            |      |          |               |             |
| Routine Checkup                                                                                                                                                                                                                                                                                  | 387       | 93.7 | 695        | 98.2 | 1.045*** | [1.017,1.074] | 1121        |
| Flu shot, lifetime                                                                                                                                                                                                                                                                               | 348       | 84.3 | 652        | 92.1 | 1.068*** | [1.019,1.119] | 1121        |
| Flu shot, timely                                                                                                                                                                                                                                                                                 | 329       | 79.7 | 632        | 89.3 | 1.086*** | [1.029,1.146] | 1121        |
| Colorectal, lifetime                                                                                                                                                                                                                                                                             | 305       | 73.8 | 580        | 81.9 | 1.076**  | [1.007,1.150] | 1121        |
| HIV test, lifetime#                                                                                                                                                                                                                                                                              | 155       | 73.1 | 289        | 80.7 | 1.144*** | [1.043,1.253] | 570         |
| HIV test, recent#                                                                                                                                                                                                                                                                                | 80        | 37.7 | 166        | 46.4 | 1.357*** | [1.097,1.678] | 570         |
| Mammogram, lifetime~                                                                                                                                                                                                                                                                             | 180       | 93.3 | 248        | 93.2 | 1.002    | [0.952,1.054] | 459         |
| Mammogram, timely~                                                                                                                                                                                                                                                                               | 153       | 79.3 | 221        | 83.1 | 1.051    | [0.961,1.150] | 459         |
| Pap Smear, lifetime~                                                                                                                                                                                                                                                                             | 171       | 88.6 | 229        | 86.1 | 0.972    | [0.908,1.040] | 459         |
| Pap Smear, timely~                                                                                                                                                                                                                                                                               | 118       | 61.1 | 151        | 56.8 | 0.905    | [0.773,1.059] | 459         |
| <b>Chronic Disease Management</b>                                                                                                                                                                                                                                                                |           |      |            |      |          |               |             |
| Mental health condition under control                                                                                                                                                                                                                                                            | 127       | 65.5 | 260        | 77.4 | 1.122*   | [1.000,1.259] | 530         |
| Blood pressure under control                                                                                                                                                                                                                                                                     | 204       | 89.5 | 347        | 93.3 | 1.031    | [0.976,1.089] | 600         |
| Diabetes under control                                                                                                                                                                                                                                                                           | 72        | 75   | 103        | 73   | 0.938    | [0.805,1.093] | 237         |
| Heart condition under control                                                                                                                                                                                                                                                                    | 66        | 90.4 | 79         | 86.8 | 1.021    | [0.917,1.138] | 164         |
| Respiratory condition under control                                                                                                                                                                                                                                                              | 87        | 82.9 | 124        | 88.6 | 0.997    | [0.897,1.108] | 245         |
| Arthritis/rheumatism under control                                                                                                                                                                                                                                                               | 69        | 50   | 100        | 50   | 0.922    | [0.731,1.163] | 338         |
| <b>Aging Outcomes^</b>                                                                                                                                                                                                                                                                           |           |      |            |      |          |               |             |
| Level of Cognitive Decline                                                                                                                                                                                                                                                                       | 0         | 2    | 0          | 1    | 0.812*   | [0.656,1.00]  | 1121        |
| Impairments to Activites of Daily Living                                                                                                                                                                                                                                                         | 0         | 1    | 0          | 1    | 0.896    | [0.755,1.063] | 1121        |
| Data come from Wave I VUSNAPS (R01-AG063771) *p<0.1, ** p<0.05, *** p<0.01                                                                                                                                                                                                                       |           |      |            |      |          |               |             |
| aRR estimated via modified Poisson regression. All models adjusted for gender, race and ethnicity, age, educational attainment, state of residency, and health insurance status. # analysis conducted among pariticipants whose current gender identity is male, transgender/gender nonbinary. ~ |           |      |            |      |          |               |             |

# Figure 1. Adjusted Risk Ratio for Preventive Care and Chronic Disease Management by Access to LGBTQ+ Affirming Provider

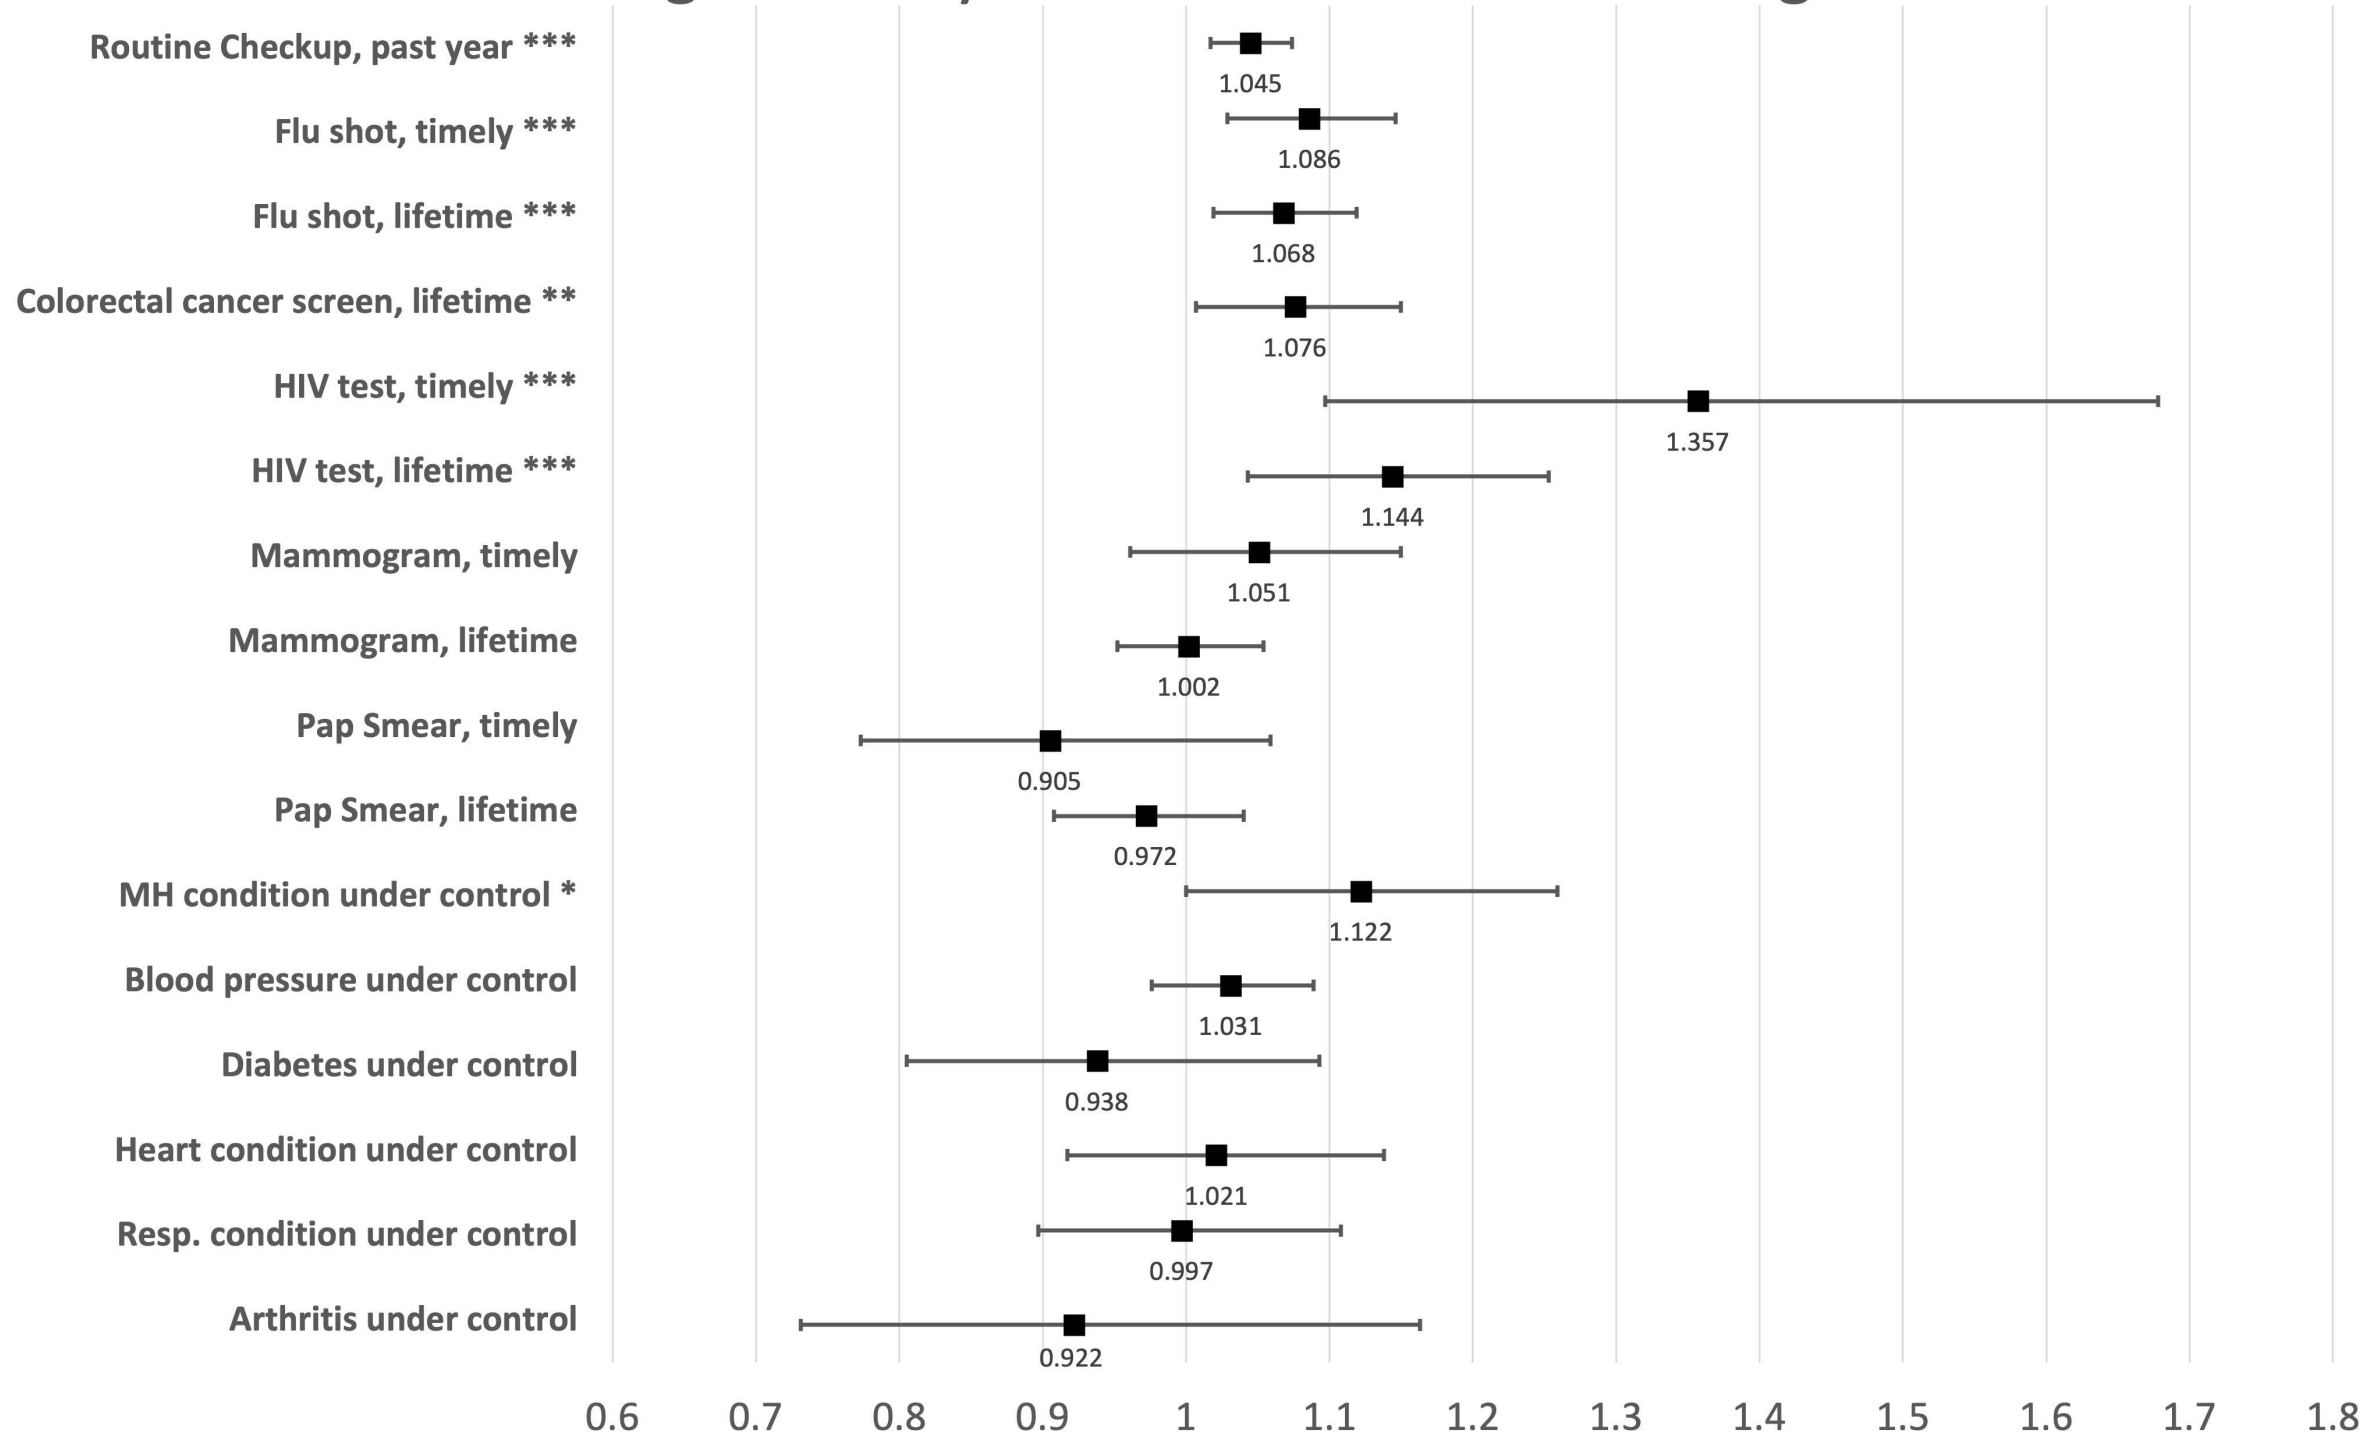

\*\*\* p < 0.01   \*\* p < 0.05.   \*p < 0.10

Data: VUSNAPS Wave I

Adjusted Risk Ratio
